# Supplementary material
Source: PubMed Central journal article supplement (PMC4272591)
Supplement: JB.02171-14_zjb999093445so1.pdf [file JB.02171-14_zjb999093445so1.pdf]

**Universal response-adaptation relation in bacterial chemotaxis**

Anna K. Krembel, Silke Neumann, and Victor Sourjik

**Table S1: Strains and plasmids used in this study.**

| Strain/Plasmid | Relevant genotype                                                           | Reference                     |
|----------------|-----------------------------------------------------------------------------|-------------------------------|
| pKG110         | Salicylate regulation ( $P_{nahG}$ ), pACYC ori, Cam <sup>R</sup>           | J.S. Parkinson, personal gift |
| pVS88          | <i>cheY-eyfp cheZ-ecfp</i> ; pTrc99a derivative, Amp <sup>R</sup>           | (1)                           |
| pVS362         | <i>tsr</i> [EEEEEE]; pKG110 derivative                                      | (2)                           |
| pVS1086        | <i>tar</i> [EEEE]; pKG110 derivative                                        | This work                     |
| SN1            | LJ110 $\Delta$ ( <i>cheY-cheZ</i> )                                         | (3)                           |
| SN11           | LJ110 $\Delta$ ( <i>cheY-cheZ</i> ) <i>tsr::Tn5</i> , Kan <sup>R</sup>      | (3)                           |
| SN25           | LJ110 $\Delta$ ( <i>cheY-cheZ</i> ) $\Delta$ <i>tar</i>                     | (3)                           |
| UU2795         | RP437 $\Delta$ ( <i>cheY-cheZ</i> ) $\Delta$ ( <i>tar tap trg aer</i> )     | J.S. Parkinson, personal gift |
| VS181          | RP437 $\Delta$ ( <i>cheY-cheZ</i> ) $\Delta$ ( <i>tsr tar tap trg aer</i> ) | (1)                           |

**Supplementary references**

1. **Sourjik V, Berg HC.** 2004. Functional interactions between receptors in bacterial chemotaxis. *Nature* 428:437-441.
2. **Oleksiuk O, Jakovljevic V, Vladimirov N, Carvalho R, Paster E, Ryu WS, Meir Y, Wingreen NS, Kollmann M, Sourjik V.** 2011. Thermal robustness of signaling in bacterial chemotaxis. *Cell* 145:312-321.
3. **Neumann S, Hansen CH, Wingreen NS, Sourjik V.** 2010. Differences in signalling by directly and indirectly binding ligands in bacterial chemotaxis. *EMBO J* 29:3484-3495.
